# Supplementary material for: Functional diversity of NLRP3 gain-of-function mutants associated with CAPS autoinflammation
Source: PubMed Central journal article supplement (PMC10966137; doi:10.1084/jem.20231200), 2024-03-26

H

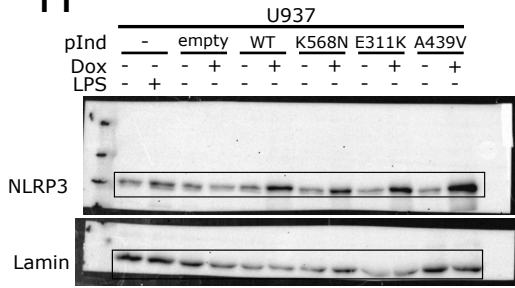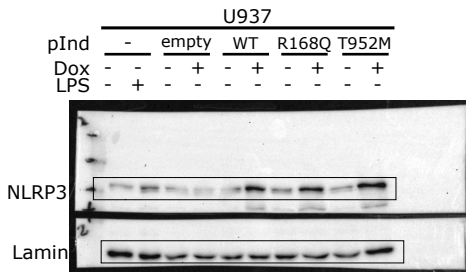

Supplement: JEM_20231200_SourceDataFS2.pdf [file JEM_20231200_SourceDataFS2.pdf]
